# Supplementary material
Source: publisher figshare collection journal article supplement (https://frontiersin.figshare.com/ndownloader/files/31045735)
Supplement: Supplementary file [file 31045735]

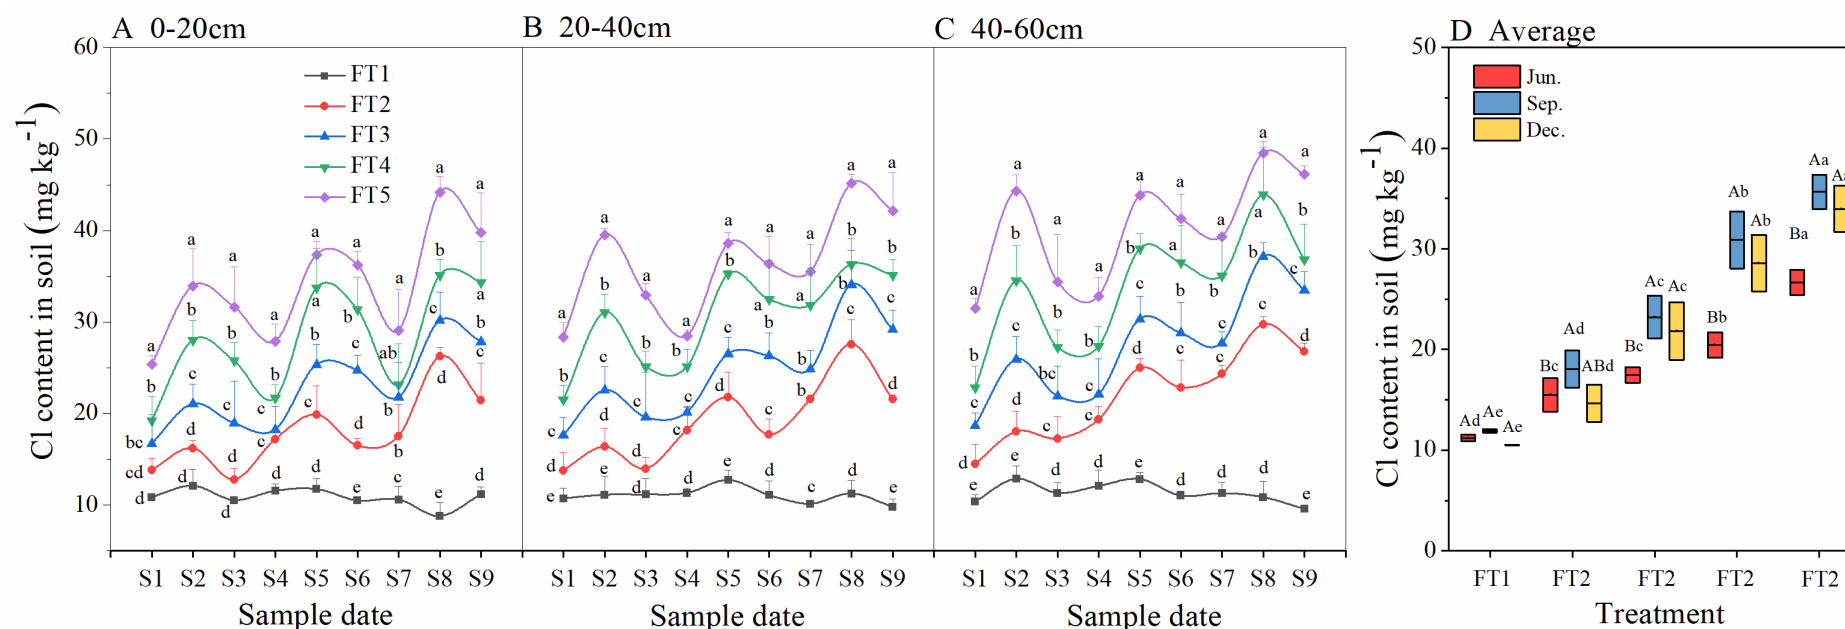

**Supplementary Figure S2** Soil chloride dynamics change in the 0–20 cm (a), 20–40 cm (b) and 40–60 cm (c) soil layers, and chloride in the 0–60cm soil layers (d) at June, September and December under different chloride treatments in five-year field experiment from 2016–2018. S1: June 2016, S2: September 2016, S3: December 2016, S4: June 2017, S5: September 2017, S6: December 2017, S7: June 2018, S8: September 2018, S9: December 2018. Bars are means of three replicates  $\pm$  SD. Different letters (a, b, c, d) in each sub-figure represent significant differences at ( $P < 0.05$ ).
